# Supplementary material for: Chelate Coordination Compounds as a New Class of High-Energy Materials: The Case of Nitro-Bis(Acetylacetonato) Complexes
Source: MDPI journal article supplement (doi:10.3390/molecules26185438), 2021-09-07
Supplement: s1 [file s1]

## Chelate Coordination Compounds as a New Class of High-Energy Materials. The Case of Nitro-Bis(Acetylacetonato) Complexes.

Danijela S. Kretić, Ivana S. Veljković, Aleksandra B. Đunović and Dušan Ž. Veljković \*

### I Crystal structures extracted from Cambridge Structural Database

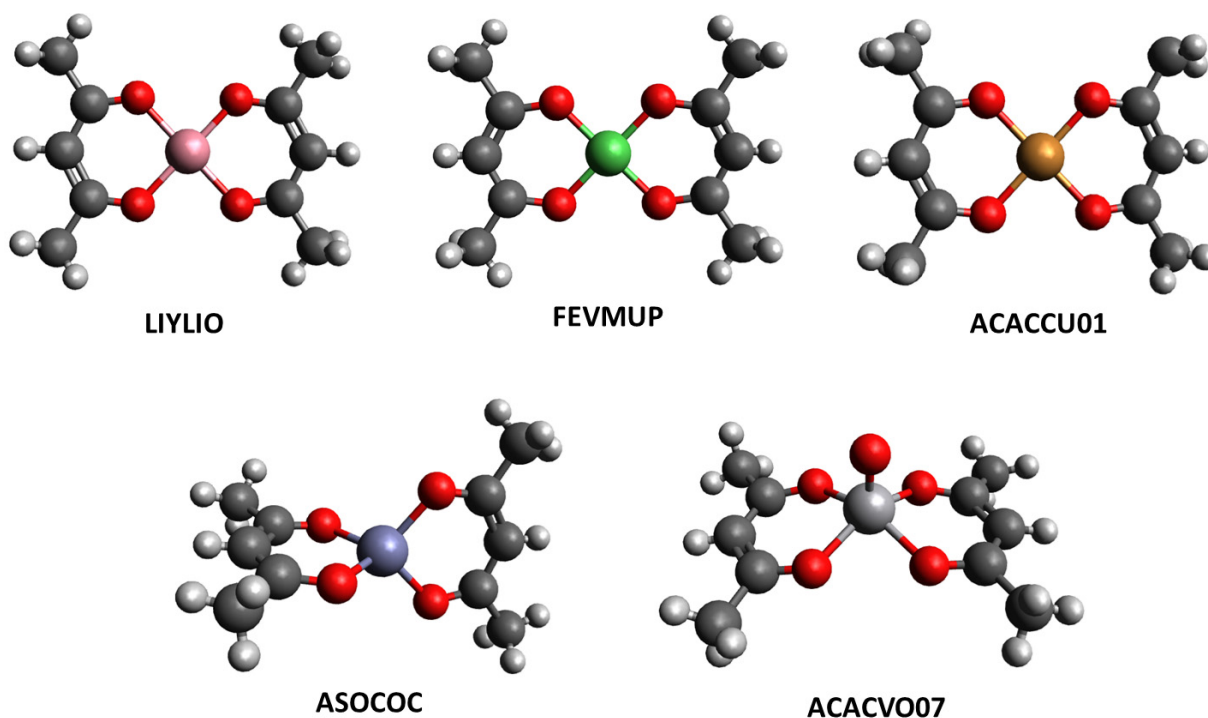

**Figure S1.** Crystal structures extracted from Cambridge Structural Database: LIYLIO (bis (acetylacetonato) cobalt (II)), FEVMUP (bis (acetylacetonato) nickel (II)), ACACCU01 (bis (acetylacetonato) copper (II)), ASOCOC (bis (acetylacetonato) zinc (II)) and ACACVO07 (bis (acetylacetonato) oxovanadium (IV)).

## II Cartesian coordinates for optimized geometries of chelate complexes

**Table S1. Cartesian coordinates for optimized geometry of Co(acac)<sub>2</sub> complex**

| atom | x        | y        | z        |
|------|----------|----------|----------|
| O    | -1.27895 | 1.35443  | 0.00023  |
| O    | -1.27895 | -1.35443 | 0.00018  |
| C    | -2.54669 | 1.22412  | -0.00006 |
| C    | -3.22381 | 0.00000  | -0.00021 |
| C    | -2.54669 | -1.22412 | -0.00003 |
| C    | -3.31200 | 2.50991  | -0.00019 |
| C    | -3.31200 | -2.50991 | 0.00005  |
| H    | -4.31461 | 0.00000  | -0.00040 |
| H    | -3.02572 | 3.10294  | -0.88267 |
| H    | -3.02575 | 3.10311  | 0.88218  |
| H    | -4.39885 | 2.35632  | -0.00021 |
| H    | -4.39886 | -2.35632 | -0.00058 |
| H    | -3.02525 | -3.10338 | -0.88197 |
| H    | -3.02623 | -3.10266 | 0.88288  |
| H    | 3.02559  | -3.10313 | 0.88227  |
| H    | 3.02578  | 3.10297  | 0.88251  |
| C    | 3.31200  | -2.50991 | -0.00003 |
| H    | 4.39885  | -2.35632 | 0.00016  |
| C    | 2.54669  | -1.22412 | 0.00001  |
| C    | 3.22381  | 0.00000  | 0.00008  |
| H    | 4.31461  | 0.00000  | 0.00015  |
| O    | 1.27895  | -1.35443 | -0.00012 |
| C    | 2.54669  | 1.22412  | 0.00000  |
| C    | 3.31200  | 2.50991  | 0.00004  |
| O    | 1.27895  | 1.35443  | -0.00012 |
| H    | 4.39886  | 2.35632  | -0.00001 |
| H    | 3.02588  | -3.10292 | -0.88257 |
| H    | 3.02570  | 3.10308  | -0.88233 |
| Co   | 0.00000  | 0.00000  | 0.00005  |

**Table S2. Cartesian coordinates for optimized geometry of Co(acac-NO<sub>2</sub>)<sub>2</sub> complex**

| atom | x        | y        | z        |
|------|----------|----------|----------|
| O    | -1.29948 | 1.34032  | 0.07189  |
| O    | -1.29310 | -1.33806 | -0.06695 |
| C    | -2.55875 | 1.25164  | 0.05448  |
| C    | -3.23500 | -0.00255 | 0.00191  |
| C    | -2.56224 | -1.24664 | -0.04875 |
| C    | -3.27245 | 2.56241  | 0.13702  |
| C    | -3.26669 | -2.56198 | -0.12468 |
| N    | -4.69257 | -0.00219 | -0.00214 |
| H    | -3.64077 | 2.84411  | -0.86033 |
| H    | -2.55508 | 3.31424  | 0.48768  |
| H    | -4.15368 | 2.52532  | 0.79008  |
| H    | -4.15996 | -2.53257 | -0.76106 |
| H    | -2.54847 | -3.30725 | -0.48753 |
| H    | -3.61378 | -2.84917 | 0.87906  |
| H    | 3.63974  | -2.84510 | 0.85812  |
| H    | 2.54843  | 3.30680  | 0.49030  |
| C    | 3.27234  | -2.56238 | -0.13925 |
| H    | 4.15419  | -2.52472 | -0.79149 |
| C    | 2.55867  | -1.25159 | -0.05627 |
| C    | 3.23495  | 0.00248  | -0.00114 |
| N    | 4.69255  | 0.00200  | 0.00509  |
| O    | 1.29940  | -1.34015 | -0.07591 |
| C    | 2.56230  | 1.24661  | 0.04946  |
| C    | 3.26691  | 2.56175  | 0.12751  |
| O    | 1.29313  | 1.33830  | 0.06569  |
| H    | 4.15947  | 2.53158  | 0.76485  |
| H    | 2.55530  | -3.31377 | -0.49152 |
| H    | 3.61514  | 2.84988  | -0.87557 |
| Co   | 0.00000  | 0.00013  | -0.00161 |
| O    | 5.26023  | -0.89511 | 0.60554  |
| O    | 5.26871  | 0.89765  | -0.5893  |
| O    | -5.26123 | 0.89438  | -0.60255 |
| O    | -5.26777 | -0.89735 | 0.59389  |

**Table S3. Cartesian coordinates for optimized geometry of Ni(acac)<sub>2</sub> complex**

| atom | x        | y        | z        |
|------|----------|----------|----------|
| O    | 1.25847  | -1.36345 | 0.00045  |
| O    | 1.25850  | 1.36343  | 0.00030  |
| C    | 2.52234  | -1.22463 | -0.00005 |
| C    | 3.20021  | -0.00002 | -0.00039 |
| C    | 2.52235  | 1.22463  | -0.00001 |
| C    | 3.29319  | -2.50871 | -0.00021 |
| C    | 3.29326  | 2.50868  | 0.00018  |
| H    | 4.29114  | 0.00000  | -0.00068 |
| H    | 3.00849  | -3.10229 | -0.88292 |
| H    | 3.00874  | -3.10235 | 0.88255  |
| H    | 4.37954  | -2.35029 | -0.00038 |
| H    | 4.37959  | 2.35020  | -0.00086 |
| H    | 3.00790  | 3.10302  | -0.88179 |
| H    | 3.00954  | 3.10159  | 0.88367  |
| H    | -3.00835 | 3.10254  | 0.88234  |
| H    | -3.00879 | -3.10222 | 0.88293  |
| C    | -3.29321 | 2.50871  | -0.00015 |
| H    | -4.37956 | 2.35028  | 0.00023  |
| C    | -2.52235 | 1.22463  | -0.00011 |
| C    | -3.20021 | 0.00002  | 0.00012  |
| H    | -4.29115 | -0.00002 | 0.00026  |
| O    | -1.25847 | 1.36345  | -0.00028 |
| C    | -2.52235 | -1.22463 | 0.00003  |
| C    | -3.29324 | -2.50868 | 0.00011  |
| O    | -1.25849 | -1.36343 | -0.00013 |
| H    | -4.37958 | -2.35021 | -0.00004 |
| H    | -3.00895 | 3.10210  | -0.88314 |
| H    | -3.00859 | -3.10241 | -0.88252 |
| Ni   | 0.00000  | 0.00000  | 0.00002  |

**Table S4. Cartesian coordinates for optimized geometry of Ni(acac-NO<sub>2</sub>)<sub>2</sub> complex**

| atom | x        | y        | z        |
|------|----------|----------|----------|
| O    | 1.26654  | 1.33480  | 0.07266  |
| O    | 1.26650  | -1.33483 | -0.07279 |
| C    | 2.52887  | 1.24670  | 0.05095  |
| C    | 3.20803  | -0.00005 | 0.00000  |
| C    | 2.52883  | -1.24680 | -0.05104 |
| C    | 3.23084  | 2.56418  | 0.12684  |
| C    | 3.23068  | -2.56434 | -0.12705 |
| H    | 2.50668  | 3.31264  | 0.47051  |
| H    | 3.60066  | 2.84109  | -0.87120 |
| H    | 4.11048  | 2.53684  | 0.78240  |
| H    | 3.60049  | -2.84137 | 0.87096  |
| H    | 2.50641  | -3.31270 | -0.47074 |
| H    | 4.11028  | -2.53708 | -0.78266 |
| H    | -2.50686 | -3.31266 | -0.47053 |
| H    | -3.60047 | 2.84125  | -0.87115 |
| H    | -4.11066 | -2.53674 | -0.78219 |
| C    | -3.23092 | -2.56414 | -0.12675 |
| N    | -4.66362 | -0.00002 | -0.00007 |
| C    | -3.20799 | 0.00004  | 0.00000  |
| C    | -2.52887 | -1.24671 | -0.05099 |
| C    | -3.23078 | 2.56427  | 0.12692  |
| C    | -2.52883 | 1.24678  | 0.05106  |
| O    | -1.26654 | -1.33481 | -0.07269 |
| H    | -4.11049 | 2.53694  | 0.78238  |
| O    | -1.26650 | 1.33484  | 0.07279  |
| H    | -3.60062 | -2.84102 | 0.87135  |
| H    | -2.50663 | 3.31271  | 0.47071  |
| Ni   | 0.00000  | 0.00000  | -0.00001 |
| N    | 4.66367  | 0.00002  | 0.00009  |
| O    | 5.23656  | 0.91211  | -0.5728  |
| O    | 5.23663  | -0.91201 | 0.57298  |
| O    | -5.23649 | -0.91233 | 0.57247  |
| O    | -5.23655 | 0.91231  | -0.57254 |

**Table S5. Cartesian coordinates for optimized geometry of Cu(acac)<sub>2</sub> complex**

| atom | x        | y        | z        |
|------|----------|----------|----------|
| O    | -1.33117 | -1.39535 | 0.00012  |
| O    | -1.33117 | 1.39535  | -0.00013 |
| C    | -2.59111 | -1.23407 | 0.00011  |
| C    | -3.25717 | 0.00000  | 0.00001  |
| C    | -2.59111 | 1.23407  | -0.00011 |
| C    | -3.38994 | -2.50336 | 0.00021  |
| C    | -3.38994 | 2.50336  | -0.00036 |
| H    | -3.11455 | -3.10228 | 0.88243  |
| H    | -3.11476 | -3.10222 | -0.88211 |
| H    | -4.47378 | -2.32750 | 0.00032  |
| H    | -3.11439 | 3.10257  | 0.88161  |
| H    | -3.11492 | 3.10193  | -0.88293 |
| H    | -4.47378 | 2.32750  | 0.00000  |
| H    | 3.11495  | 3.10214  | -0.88223 |
| H    | 3.11459  | -3.10207 | -0.88274 |
| H    | 4.47378  | 2.32750  | 0.00056  |
| C    | 3.38994  | 2.50336  | 0.00020  |
| C    | 3.25717  | 0.00000  | -0.00006 |
| C    | 2.59111  | 1.23407  | 0.00009  |
| C    | 3.38994  | -2.50336 | -0.00037 |
| C    | 2.59111  | -1.23407 | -0.00008 |
| O    | 1.33117  | 1.39535  | 0.00026  |
| H    | 4.47378  | -2.32750 | -0.00044 |
| O    | 1.33117  | -1.39535 | -0.00002 |
| H    | 3.11436  | 3.10236  | 0.88230  |
| H    | 3.11472  | -3.10242 | 0.88179  |
| Cu   | 0.00000  | -0.00000 | 0.00007  |
| H    | 4.34848  | 0.00000  | -0.00015 |
| H    | -4.34848 | 0.00000  | 0.00001  |

**Table S6. Cartesian coordinates for optimized geometry of Cu(acac-NO<sub>2</sub>)<sub>2</sub> complex**

| atom | x        | y        | z        |
|------|----------|----------|----------|
| O    | -1.34631 | -1.36085 | 0.06962  |
| O    | -1.34632 | 1.36084  | -0.06928 |
| C    | -2.60569 | -1.25496 | 0.05229  |
| C    | -3.27452 | -0.00001 | 0.00004  |
| C    | -2.60569 | 1.25494  | -0.05210 |
| C    | -3.33384 | -2.56012 | 0.13508  |
| C    | -3.33385 | 2.56010  | -0.13487 |
| H    | -2.62471 | -3.31642 | 0.49312  |
| H    | -3.69508 | -2.84205 | -0.86483 |
| H    | -4.21981 | -2.51544 | 0.78117  |
| H    | -3.69521 | 2.84196  | 0.86502  |
| H    | -2.62471 | 3.31643  | -0.49280 |
| H    | -4.21977 | 2.51543  | -0.78104 |
| H    | 2.62437  | 3.31645  | -0.49261 |
| H    | 3.69529  | -2.84202 | -0.86508 |
| H    | 4.21947  | 2.51572  | -0.78124 |
| C    | 3.33370  | 2.56020  | -0.13488 |
| N    | 4.73223  | 0.00001  | 0.00006  |
| C    | 3.27457  | -0.00001 | -0.00002 |
| C    | 2.60569  | 1.25496  | -0.05201 |
| C    | 3.33370  | -2.56021 | 0.13474  |
| C    | 2.60570  | -1.25498 | 0.05187  |
| O    | 1.34632  | 1.36082  | -0.06937 |
| H    | 4.21943  | -2.51576 | 0.78118  |
| O    | 1.34632  | -1.36085 | 0.06913  |
| H    | 3.69520  | 2.84205  | 0.86496  |
| H    | 2.62436  | -3.31650 | 0.49238  |
| Cu   | 0.00000  | -0.00001 | 0.00002  |
| N    | -4.73216 | -0.00002 | -0.00007 |
| O    | -5.30501 | -0.88265 | -0.61738 |
| O    | -5.30511 | 0.88273  | 0.617    |
| O    | 5.30514  | 0.88203  | 0.61821  |
| O    | 5.30523  | -0.88193 | -0.61813 |

**Table S7. Cartesian coordinates for optimized geometry of Zn(acac)<sub>2</sub> complex**

| atom | x        | y        | z        |
|------|----------|----------|----------|
| H    | -4.06654 | 2.37792  | -1.13680 |
| C    | -3.41054 | 1.74784  | -1.75790 |
| H    | -2.79019 | 2.38621  | -2.39878 |
| H    | -4.07322 | -1.11781 | 2.38002  |
| C    | -2.53967 | 0.88480  | -0.89052 |
| C    | -3.17380 | 0.00266  | -0.00015 |
| H    | -4.26757 | 0.00517  | 0.00052  |
| O    | -1.28443 | 1.02943  | -1.03988 |
| C    | -2.54264 | -0.88304 | 0.88877  |
| C    | -3.41636 | -1.74373 | 1.75565  |
| H    | -4.06526 | 1.12321  | -2.38586 |
| O    | -1.28789 | -1.03356 | 1.03664  |
| H    | -2.79805 | -2.38089 | 2.39970  |
| H    | -4.07022 | -2.37531 | 1.13377  |
| H    | 4.06891  | -2.38378 | -1.11791 |
| C    | 3.41630  | -1.75519 | -1.74414 |
| H    | 2.79799  | -2.39557 | -2.38497 |
| H    | 4.06393  | 1.13796  | 2.37990  |
| C    | 2.54264  | -0.88871 | -0.88302 |
| C    | 3.17380  | 0.00258  | 0.00025  |
| H    | 4.26758  | 0.00470  | -0.00011 |
| O    | 1.28786  | -1.03981 | -1.03016 |
| C    | 2.53967  | 0.89074  | 0.88467  |
| C    | 3.41059  | 1.75892  | 1.74688  |
| H    | 4.07441  | -1.13361 | -2.37151 |
| O    | 1.28446  | 1.03692  | 1.03261  |
| H    | 2.79025  | 2.40235  | 2.38269  |
| H    | 4.06796  | 2.38392  | 1.12213  |
| Zn   | 0.00000  | -0.00265 | 0.00002  |



**Table S8. Cartesian coordinates for optimized geometry of Zn(acac-NO<sub>2</sub>)<sub>2</sub> complex**

| atom | x        | y        | z        |
|------|----------|----------|----------|
| H    | -4.24193 | 2.30994  | -1.19750 |
| C    | -3.35018 | 1.91182  | -1.69825 |
| H    | -2.66544 | 2.72240  | -1.97666 |
| H    | -3.70448 | -1.40818 | 2.60986  |
| C    | -2.58374 | 0.93937  | -0.85710 |
| C    | -3.22783 | -0.00008 | 0.00010  |
| N    | -4.69062 | -0.00044 | 0.00015  |
| O    | -1.32545 | 1.04863  | -0.94780 |
| C    | -2.58325 | -0.93923 | 0.85727  |
| C    | -3.34919 | -1.91193 | 1.69860  |
| H    | -3.70543 | 1.40798  | -2.60948 |
| O    | -1.32491 | -1.04796 | 0.94784  |
| H    | -2.66409 | -2.72223 | 1.97694  |
| H    | -4.24089 | -2.31040 | 1.19803  |
| H    | 3.70367  | -2.61074 | -1.40733 |
| C    | 3.34948  | -1.69917 | -1.91129 |
| H    | 2.66478  | -1.97699 | -2.72212 |
| H    | 4.24093  | 1.19772  | 2.31075  |
| C    | 2.58340  | -0.85738 | -0.93911 |
| C    | 3.22786  | -0.00010 | 0.00003  |
| N    | 4.69062  | -0.00034 | -0.00006 |
| O    | 1.32509  | -0.94768 | -1.04829 |
| C    | 2.58362  | 0.85755  | 0.93897  |
| C    | 3.34985  | 1.69878  | 1.91154  |
| H    | 4.24186  | -1.19928 | -2.30904 |
| O    | 1.32531  | 0.94861  | 1.04769  |
| H    | 2.66461  | 1.97810  | 2.72139  |
| H    | 3.70606  | 2.60950  | 1.40746  |
| Zn   | 0.00001  | 0.00051  | -0.00019 |
| O    | 5.2626   | 1.07092  | 0.11081  |
| O    | 5.26214  | -1.07187 | -0.11077 |
| O    | -5.26233 | -0.11186 | 1.0715   |
| O    | -5.26246 | 0.11051  | -1.07119 |

**Table S9. Cartesian coordinates for optimized geometry of VO(acac)<sub>2</sub> complex**

| atom | x        | y        | z        |
|------|----------|----------|----------|
| O    | 1.32541  | 1.35648  | -0.08666 |
| O    | 1.32597  | -1.35643 | -0.08618 |
| C    | 3.25893  | 0.00040  | -0.27239 |
| C    | 2.58464  | 1.22712  | -0.23744 |
| C    | 2.58521  | -1.22663 | -0.23682 |
| C    | 3.33940  | 2.50520  | -0.41283 |
| C    | 3.34050  | -2.50447 | -0.41157 |
| H    | 3.16143  | 3.14828  | 0.46284  |
| H    | 4.41796  | 2.35029  | -0.54383 |
| H    | 2.93493  | 3.04405  | -1.28367 |
| H    | 3.16125  | -3.14806 | 0.46343  |
| H    | 2.93759  | -3.04292 | -1.28340 |
| H    | 4.41921  | -2.34925 | -0.54095 |
| H    | -4.41906 | 2.34941  | -0.54002 |
| C    | -3.34020 | 2.50459  | -0.41183 |
| H    | -3.15997 | 3.14894  | 0.46241  |
| C    | -2.58488 | 1.22678  | -0.23680 |
| C    | -3.25875 | -0.00021 | -0.27160 |
| O    | -1.32561 | 1.35659  | -0.08669 |
| H    | -3.15849 | -3.14966 | 0.46090  |
| H    | -2.93811 | 3.04221  | -1.28456 |
| C    | -2.58457 | -1.22699 | -0.23769 |
| O    | -1.32511 | -1.35649 | -0.08845 |
| C    | -3.33955 | -2.50495 | -0.41292 |
| H    | -2.93783 | -3.04202 | -1.28615 |
| H    | -4.41855 | -2.35009 | -0.54024 |
| V    | -0.00009 | -0.00017 | 0.49699  |
| H    | -4.34021 | -0.00030 | -0.41310 |
| H    | 4.34027  | 0.00062  | -0.41475 |
| O    | -0.00099 | -0.0005  | 2.06071  |

**Table S10. Cartesian coordinates for optimized geometry of VO(acac-NO<sub>2</sub>)<sub>2</sub> complex**

| atom | x        | y        | z        |
|------|----------|----------|----------|
| O    | 1.34218  | 1.32359  | -0.06589 |
| O    | 1.34058  | -1.32611 | 0.08122  |
| C    | 3.27582  | -0.01505 | -0.15423 |
| C    | 2.60006  | 1.23395  | -0.20124 |
| C    | 2.59752  | -1.26112 | -0.07800 |
| C    | 3.28987  | 2.52876  | -0.47723 |
| C    | 3.28693  | -2.58166 | -0.16731 |
| H    | 3.68120  | 2.92957  | 0.47061  |
| H    | 4.14743  | 2.43291  | -1.15378 |
| H    | 2.54412  | 3.22833  | -0.87499 |
| H    | 2.58304  | -3.35397 | 0.16457  |
| H    | 3.59358  | -2.77342 | -1.20587 |
| H    | 4.20869  | -2.60826 | 0.42876  |
| H    | -4.14702 | 2.43343  | -1.15279 |
| C    | -3.29001 | 2.52905  | -0.47552 |
| H    | -3.68201 | 2.92966  | 0.47213  |
| C    | -2.60048 | 1.23412  | -0.19929 |
| C    | -3.27632 | -0.01481 | -0.15337 |
| O    | -1.34276 | 1.32373  | -0.06253 |
| H    | -2.58505 | -3.35330 | 0.17165  |
| H    | -2.54394 | 3.22871  | -0.87251 |
| C    | -2.59840 | -1.26090 | -0.07463 |
| O    | -1.34173 | -1.32602 | 0.08641  |
| C    | -3.28801 | -2.58139 | -0.16311 |
| H    | -3.59175 | -2.77478 | -1.20227 |
| H    | -4.21134 | -2.60701 | 0.43049  |
| V    | 0.00050  | 0.03243  | 0.60326  |
| N    | -4.72907 | -0.00864 | -0.27977 |
| O    | 0.00364  | 0.11783  | 2.15880  |
| O    | -5.3358  | 0.90173  | 0.25774  |
| O    | -5.25931 | -0.90857 | -0.90862 |
| N    | 4.72868  | -0.00869 | -0.27796 |
| O    | 5.33419  | 0.9022   | 0.26015  |
| O    | 5.26057  | -0.90866 | -0.90518 |

### III Vibrational frequencies

**Figure S2. Calculated infrared spectrum for optimized geometry of Co(acac)<sub>2</sub> complex**

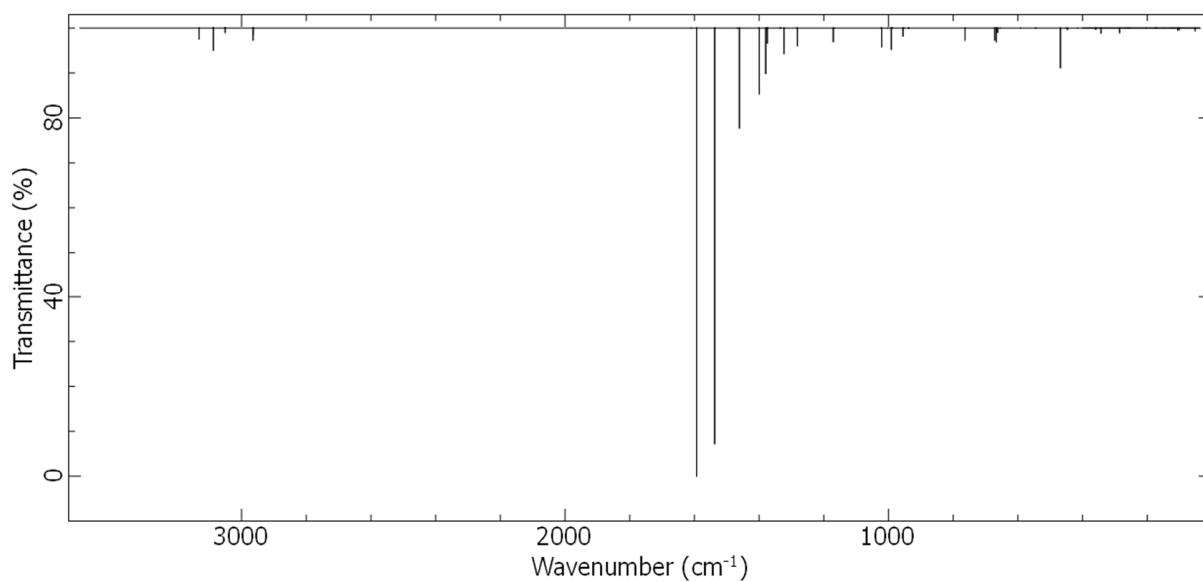

**Figure S3. Calculated infrared spectrum for optimized geometry of Co(acac-NO<sub>2</sub>)<sub>2</sub> complex**

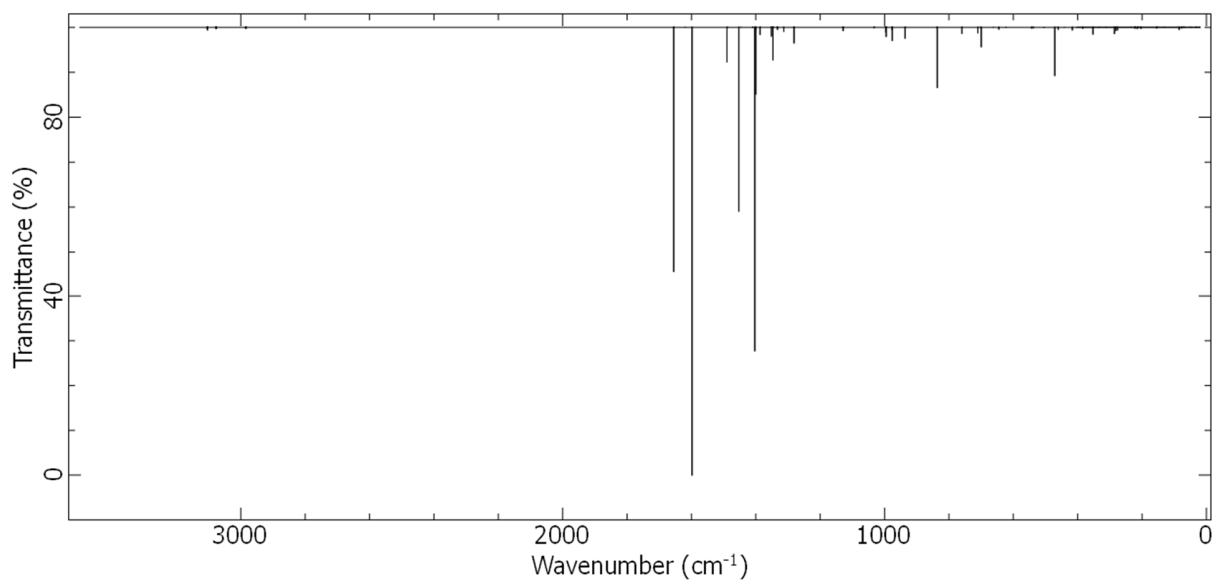

**Figure S4. Calculated infrared spectrum for optimized geometry of Ni(acac)<sub>2</sub> complex**

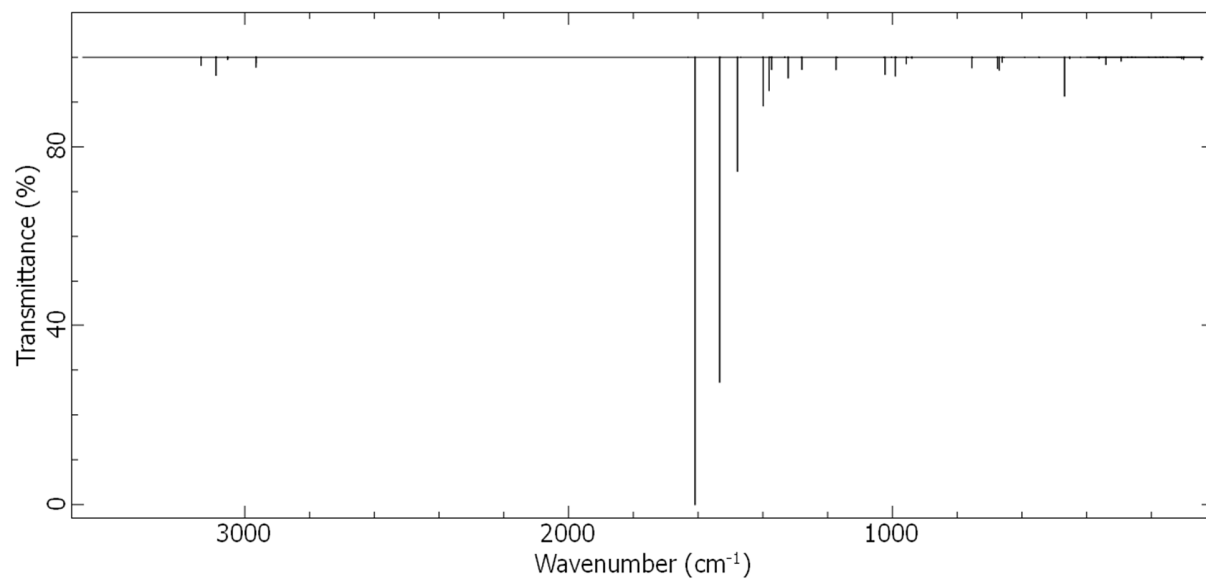

**Figure S5. Calculated infrared spectrum for optimized geometry of Ni(acac-NO<sub>2</sub>)<sub>2</sub> complex**

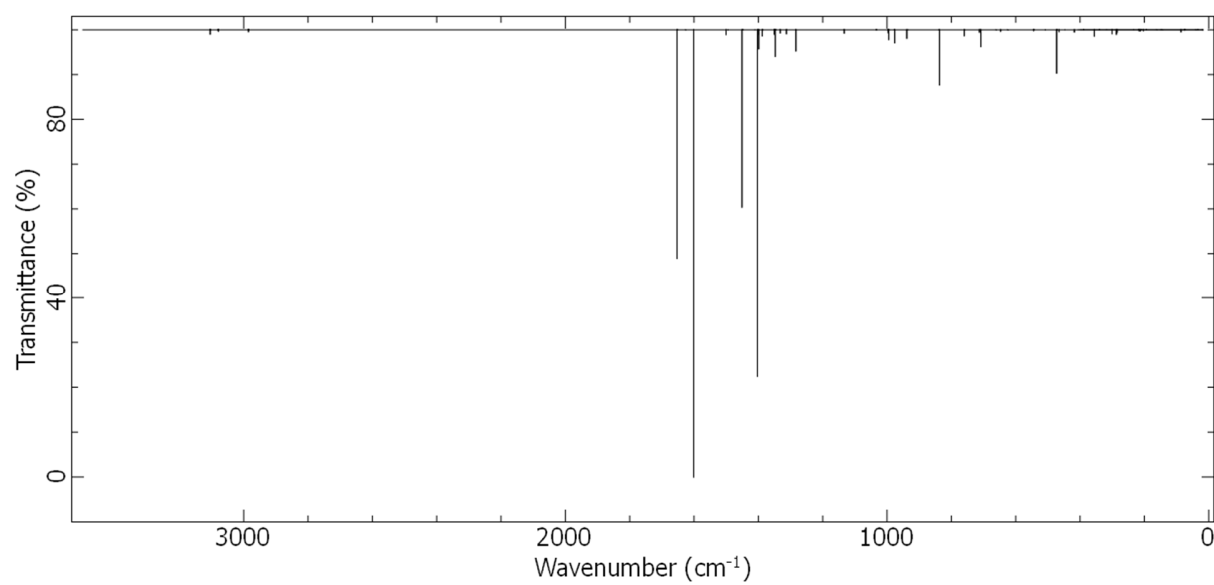

**Figure S6. Calculated infrared spectrum for optimized geometry of Cu(acac)<sub>2</sub> complex**

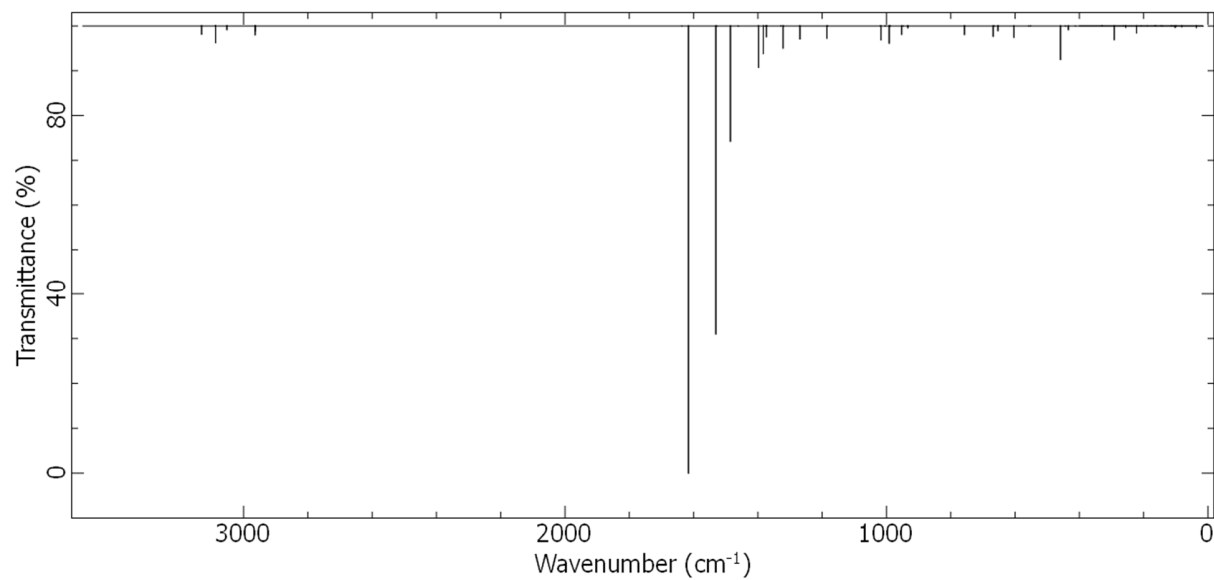

**Figure S7. Calculated infrared spectrum for optimized geometry of Cu(acac-NO<sub>2</sub>)<sub>2</sub> complex**

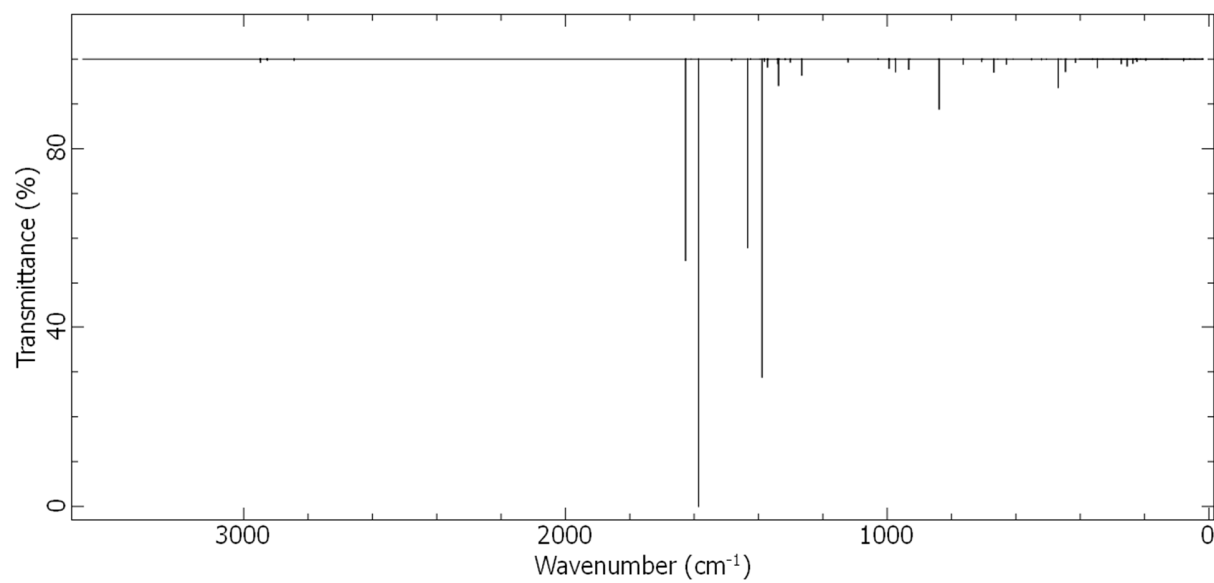

**Figure S8. Calculated infrared spectrum for optimized geometry of Zn(acac)<sub>2</sub> complex**

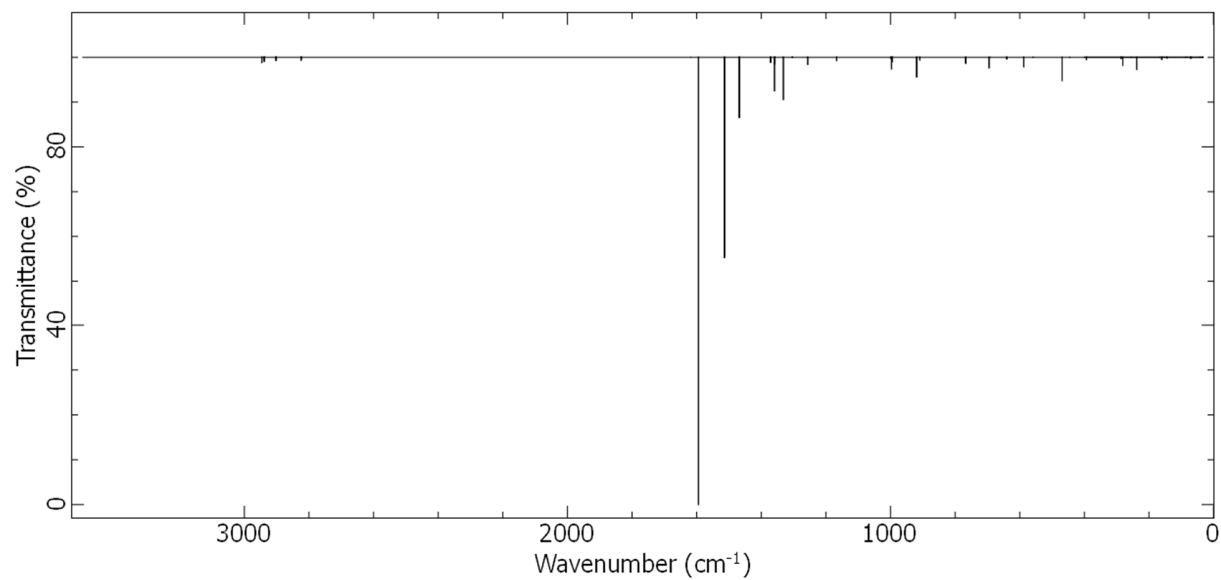

**Figure S9. Calculated infrared spectrum for optimized geometry of Zn(acac-NO<sub>2</sub>)<sub>2</sub> complex**

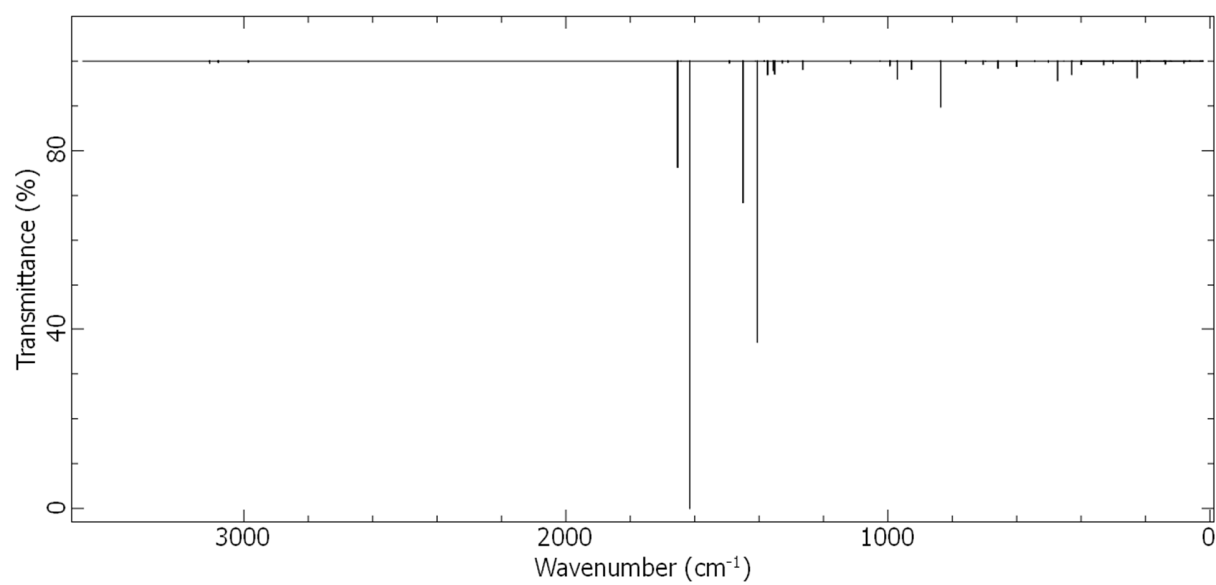

**Figure S10. Calculated infrared spectrum for optimized geometry of VO(acac)<sub>2</sub> complex**

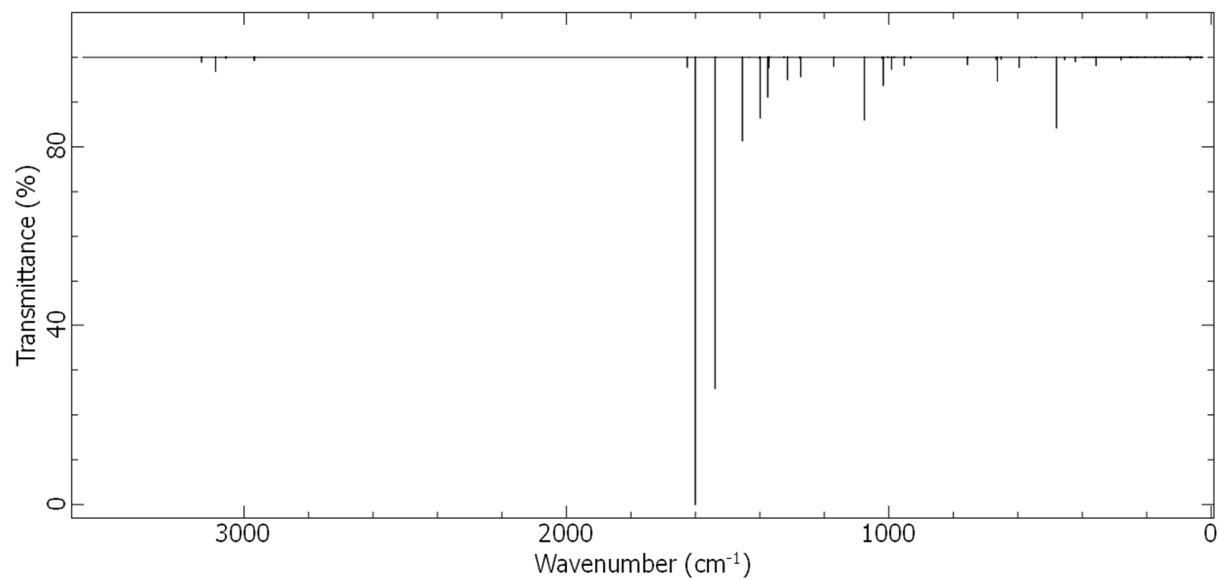

**Figure S11. Calculated infrared spectrum for optimized geometry of VO(acac-NO<sub>2</sub>)<sub>2</sub> complex**

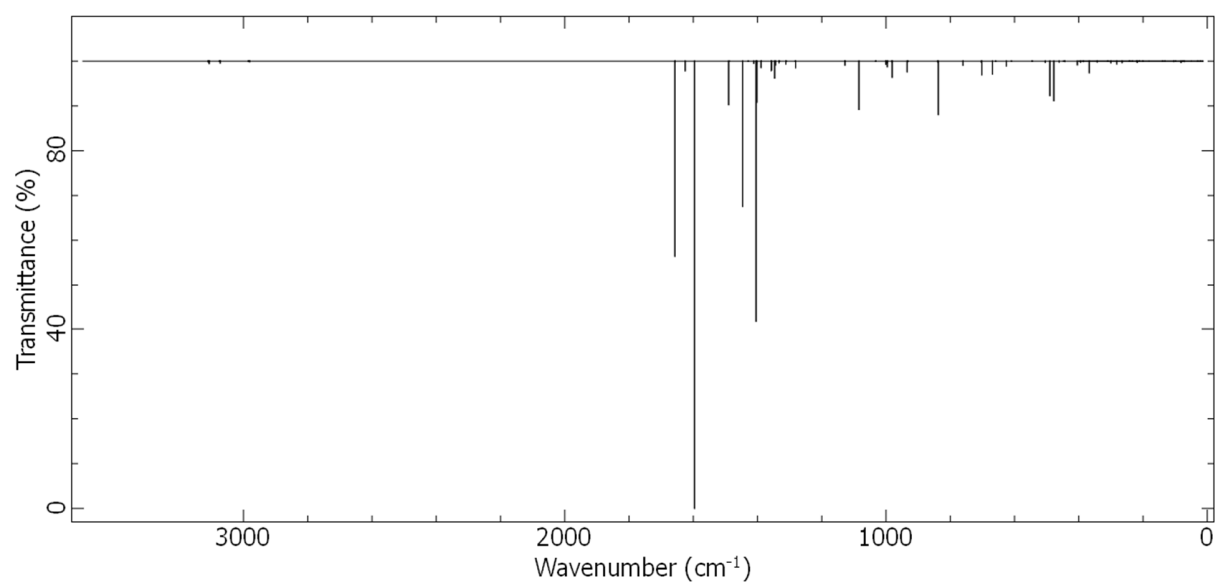



#### IV Bond dissociation energies (without zero-potential energy correction)

**Table S11.** Calculated bond dissociation energies (without zero-potential energy correction) of weakest C-NO<sub>2</sub> bonds in studied nitro-bis(acetylacetonato) complexes.

| Complex                                | E <sub>(complex)</sub> <sup>1</sup> | E <sub>(complex radical)</sub> <sup>1</sup> | E <sub>(NO<sub>2</sub> radical)</sub> <sup>1</sup> | BDE <sup>2</sup> |
|----------------------------------------|-------------------------------------|---------------------------------------------|----------------------------------------------------|------------------|
| Co(acac-NO <sub>2</sub> ) <sub>2</sub> | -2482.316510                        | -2277.092658                                | -205.128032                                        | 60.13            |
| Ni(acac-NO <sub>2</sub> ) <sub>2</sub> | -2607.862277                        | -2402.636087                                | -205.128032                                        | 61.60            |
| Cu(acac-NO <sub>2</sub> ) <sub>2</sub> | -2740.033947                        | -2534.809344                                | -205.128032                                        | 60.60            |
| Zn(acac-NO <sub>2</sub> ) <sub>2</sub> | -2878.904750                        | -2673.682471                                | -205.128032                                        | 59.14            |
| VO(acacNO <sub>2</sub> ) <sub>2</sub>  | -2118.900795                        | -1913.646821                                | -205.128032                                        | 78.03            |

<sup>1</sup> Energies given in Hartrees

<sup>2</sup> Energies given in kcal/mol

#### V Calculated electrostatic potential maps for the modified structures of (bis (acetylacetonato) and nitro-bis (acetylacetonato) oxovanadium (IV) complexes

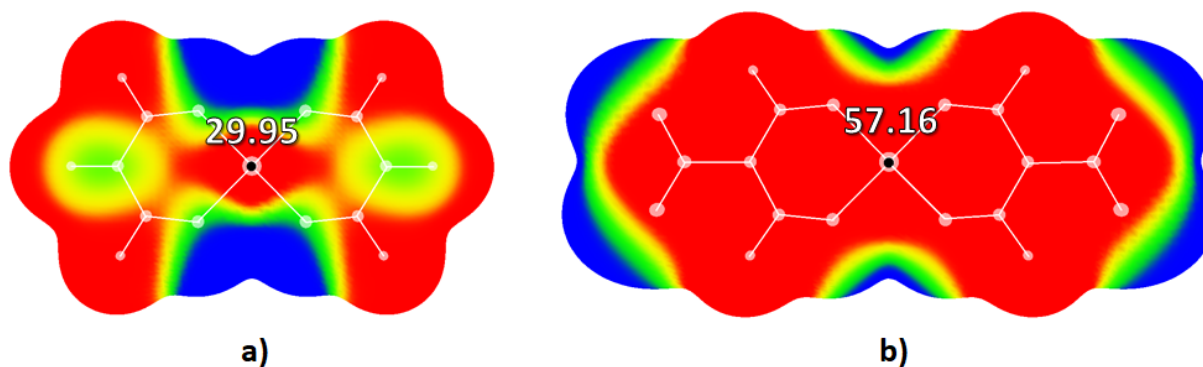

**Figure S12.** Calculated electrostatic potential maps of modified bis (acetylacetonato) and nitro-bis (acetylacetonato) oxovanadium (IV) complexes (-CH<sub>3</sub> groups substituted with H atoms).
